# Supplementary material for: Characterization of B cells in healthy pregnant women from late pregnancy to post-partum: a prospective observational study
Source: BMC Pregnancy Childbirth. 2016 Jun 6;16:139. doi: 10.1186/s12884-016-0927-7 (PMC4895979; doi:10.1186/s12884-016-0927-7)
Supplement: Additional file 6: — Correlation coefficients between counts (and percentages) of B cell subsets and time since last pregnancy, in the non-pregnant women. Corr. Coef., Spearman correlation coefficient. (XLSX 9 kb) [file 12884_2016_927_MOESM6_ESM.xlsx]

## Sheet: Sheet1
Correlation coefficients between counts (and percentages) of B cell subsets and time since last pregnancy, in the non-pregnant women
	Corr. Coef.	P value
B cell population (CD 19+), cells/µL	-0.0554	0.771
B cell population (CD 19+), %	0.034	0.858
IL 10 Regulatory B cells, cells/µL	0.1476	0.436
IL 10 Regulatory B cells, %	0.0999	0.599
CD24hi CD27+ Regulatory B cells, cells/µL	-0.2687	0.151
CD24hi CD27+ Regulatory B cells, %	-0.2155	0.253
CD24hi CD38hi Regulatory B cells, cells/µL	-0.2095	0.266
CD24hi CD38hi Regulatory B cells, %	-0.23	0.221
Unswitched memory Bm1, cells/µL	0.1556	0.412
Unswitched memory Bm1, %	0.2746	0.142
Naïve Bm2, cells/µL	-0.1841	0.33
Naïve Bm2, %	-0.3182	0.087
Transitional Bm2', cells/µL	-0.1738	0.358
Transitional Bm2', %	-0.2806	0.133
Plasmablats Bm3+Bm4, cells/µL	-0.1129	0.552
Plasmablats Bm3+Bm4, %	-0.2195	0.244
Resting memory/late Bm5, cells/µL	0.3204	0.084
Resting memory/late Bm5, %	0.3487	0.059
Post-germinal memory/early eBm5, cells/µL	0.1834	0.332
Post-germinal memory/early eBm5, %	0.3508	0.057
Description of data: Corr. Coef., Spearman correlation coefficient
